# Supplementary material
Source: publisher site journal article supplement (https://www.spandidos-publications.com/4283/downloadSupplementary)

Figure S1. Snail, Twist and epidermal growth factor receptor inhibition reverses the epithelial-mesenchymal transition phenotype in MCF-7/TR cells. (A) MCF-7/TR cells were treated with gefitinib (5  $\mu$ M) for 3 days. MCF-7/TR cell morphology was observed using an inverted microscope. Magnification, x20; scale bar, 200  $\mu$ m. (B) MCF-7/TR cells were transfected with Snail siRNA (10 nM), Twist siRNA (10 nM), or Stealth<sup>TM</sup> RNAi Negative Control (Control siRNA) for 3 days. MCF-7/TR cell morphology was observed using an inverted microscope. Magnification, x20; scale bar, 200  $\mu$ m. Snail, snail family transcriptional repressor 1; Twist, twist family BHLH transcription factor 1; MCF-7/TR, tamoxifen-resistant MCF-7 cells.

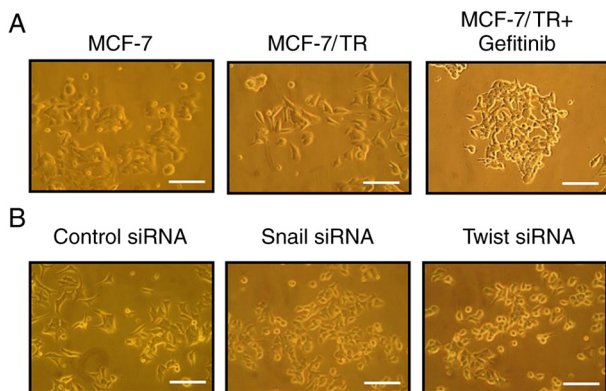

Figure S2. Whole western blots. (A) Whole western blot membrane and relative expression levels of phosphorylated EGFR, EGFR and  $\beta$ -actin in MCF-7 cells treated with gefitinib. (B) Whole western blot membrane and relative expression levels of phosphorylated EGFR, EGFR, and  $\beta$ -actin in MCF-7/TR cells treated with gefitinib. EGFR, epidermal growth factor receptor.

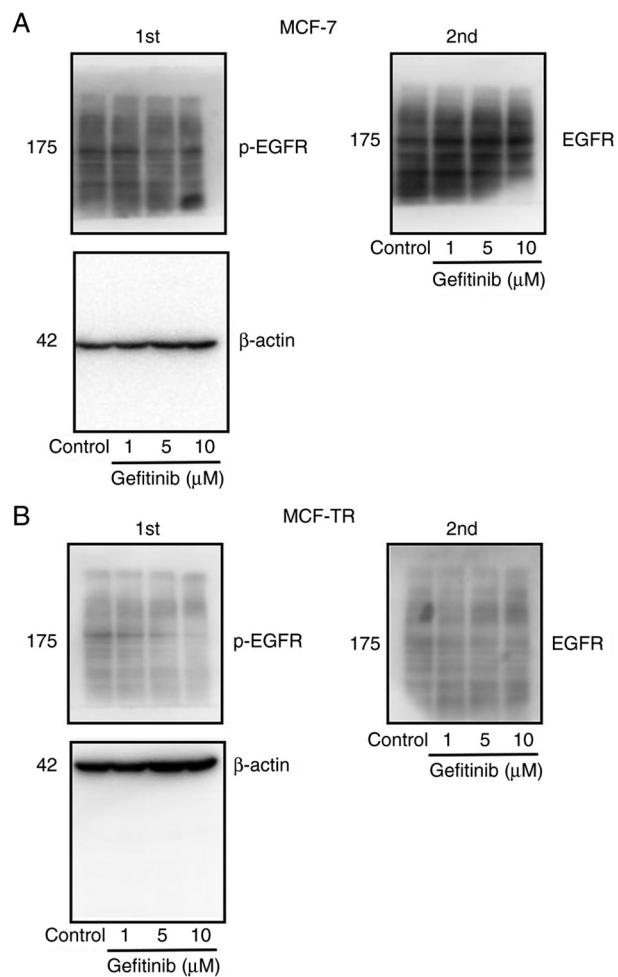

Supplement: Supplementary file 1 [file downloadSupplementary]
